# Supplementary material for: RNA interference screening in Drosophila primary cells for genes involved in muscle assembly and maintenance
Source: Oxford University Press journal article supplement (doi:10.1242/dev.012849), 2008-03-21
Supplement: dev012849-sup-012849-tables1.pdf [file dev012849-sup-012849-tables1.pdf]

**Table S1. Muscle disease genes, their *Drosophila* homologs and their primary RNAi muscle phenotypes**

| Disease genes                | Gene product                     | E-value   | Fly homolog | Fbgn#       | RNAi phenotypes |
|------------------------------|----------------------------------|-----------|-------------|-------------|-----------------|
| <b>Congenital myopathies</b> |                                  |           |             |             |                 |
| NEB                          | Nebulin                          | 6.30E-12  | Lasp        | FBgn0063485 | Class I         |
| ACTA1                        | Alpha-actin, skeletal            | 0         | Act57B      | FBgn0000044 | Class IV        |
|                              |                                  | 0         | Act42A      | FBgn0000043 | Class IV        |
|                              |                                  | 0         | Act87E      | FBgn0000046 | Class IV        |
|                              |                                  | 0         | Act5C       | FBgn0000042 | Class IV        |
| TPM1; TPM2                   | Alpha, beta-tropomyosin          | 7.60E-45  | Tm1         | FBgn0003721 | N               |
| TNNT1                        | Slow troponin T                  | 6.30E-06  | up          | FBgn0004169 | Class III       |
| MTM1                         | Myotubularin                     | 0         | mtm         | FBgn0025742 | Class II        |
| RYR1                         | Ryanodin receptor                | 0         | Rya-r44F    | FBgn0011286 | Class III       |
| ITGA7                        | Integrin alpha7                  | 6.00E-88  | mew         | FBgn0004456 | Class I         |
| <b>Cardiomyopathies</b>      |                                  |           |             |             |                 |
| FHC1 (MYH6, MYH7)            | Cardiac myosin heavy chain       | 0         | Mhc         | FBgn0002741 | Class III       |
| FHC2 (=TTNT2)                | Cardiac troponin T               |           | up          | FBgn0004169 | Class III       |
| FHC3 (MyBP-C)                | Cardiac myosin binding protein-C | 1.30E-69  | sls         | FBgn0003432 | Class II        |
|                              | Regulatory myosin light chain    |           |             |             |                 |
| MYL2                         |                                  | 2.00E-41  | sqh         | FBgn0003514 | Class II        |
|                              |                                  | 8.00E-27  | mlc2        | FBgn0002773 | Class III       |
| MYL3                         | Essential myosin light chain     | 4.00E-34  | mlc-c       | FBgn0004687 | N               |
| TNNI3 (=TNNCI)               | Cardiac troponin I               | 3.00E-06  | wupA        | FBgn0004028 | Class III       |
| FHC9                         | Titin: myosin light chain kinase | 0         | bt          |             | Class III       |
|                              |                                  | 0         | bt          | FBgn0005666 | Class III       |
| CMD1G (=TTN)                 | Titin                            |           |             |             |                 |
| VCL                          | Vinculin                         | 1.00E-92  | Vinc        | FBgn0004397 | Class IV        |
| ARVD2 (=RYR2)                | Ryanodin receptor                | 0         | Rya-r44F    | FBgn0011286 | Class III       |
| G4.5                         | Tafazzin                         | 2.00E-58  | tafazzin    | FBgn0026619 | Class II        |
| <b>Muscular dystrophies</b>  |                                  |           |             |             |                 |
| DMD                          | Dystrophin                       | 0         | Dys         | FBgn0024242 | N               |
| LMNA                         | LaminA/C                         | 4.90E-79  | Lam         | FBgn0002525 | N               |
| DYSF                         | Dysferlin                        | 2.20E-93  | mfr         | FBgn0035935 | N               |
| SGCG                         | Sarcoglycan, gamma               | 1.00E-43  | Scgdelta    | FBgn0025391 | N               |
| CAPN3                        | Calpain-3                        | 1.00E-178 | CalpB       | FBgn0025866 | Class III       |
| SGCA                         | Sarcoglycan, alpha               | 3.00E-13  | Scgalpha    | FBgn0032013 | N               |
| SGCD                         | Sarcoglycan, delta               | 6.00E-48  | Scgdelta    | FBgn0025391 | N               |
| TRIM32                       | TRIM32                           | 7.00E-15  | CG15105     | FBgn0034412 | Class II        |
| LAMA2                        | Laminin alpha 2                  | 0         | wb          | FBgn0004002 | N               |

Human muscle disease genes were selected based on the gene lists from Bornemann and Goebel (Bornemann and Goebel, 2001), Clarkson et al. (Clarkson et al., 2004) for congenital myopathies; Seidman and Seidman (Seidman and Seidman, 2001) for cardiomyopathies; the MDA website (<http://www.mdaua.org/disease/>) and Dalkilic and Kunkel (Dalkilic and Kunkel, 2003) for muscular dystrophies. *Drosophila* genes that are homologous to human disease genes were chosen based on their protein homology with the lowest E value (and at least  $\leq -5$ ) for a match to human protein (BLASTP) in Homophila (<http://superfly.ucsd.edu/homophila/>) (Chien et al., 2002), as well as their expression in muscle tissues (<http://www.fruitfly.org/cgi-bin/ex/insitu.pl>). Information on the dsRNAs targeting the *Drosophila* genes is available in Table S2 and from <http://flyrnai.org/>. The various phenotypic classes are indicated (see text). N, no muscle phenotypes.
