# Supplementary material for: RNA interference screening in Drosophila primary cells for genes involved in muscle assembly and maintenance
Source: Oxford University Press journal article supplement (doi:10.1242/dev.012849), 2008-03-21
Supplement: dev012849-sup-012849-tables2.pdf [file dev012849-sup-012849-tables2.pdf]

**Table S2. List of hits identified from the RNAi screen as potential regulators of muscle assembly**

| Comments                                                                                                                                | Gene name   | FBgn#       | Human homolog | Protein domains                                            | Molecular function                                                    | Expression in myoblasts and/or muscles |              |                |
|-----------------------------------------------------------------------------------------------------------------------------------------|-------------|-------------|---------------|------------------------------------------------------------|-----------------------------------------------------------------------|----------------------------------------|--------------|----------------|
|                                                                                                                                         |             |             |               |                                                            |                                                                       | BDGP in situ                           | Furlong lab. | Michelson lab. |
| <b>Class I. Muscles are rounded up</b>                                                                                                  |             |             |               |                                                            |                                                                       |                                        |              |                |
| Severe                                                                                                                                  | CG2165      | FBgn0025704 | ATP2B3        | Calcium-translocating P-type ATPase, PMCA-type             | Calcium-transporting ATPase activity                                  | N/A                                    | Yes          | No             |
| Medium                                                                                                                                  | Fit1        | FBgn0035498 | PLEKHC1       | FERM, Pleckstrin-like, Band 4.1, PH                        | Cell adhesion molecule binding                                        | N/A                                    | Yes          | N/A            |
| Medium                                                                                                                                  | ldh         | FBgn0001248 | IDH1          | Isocitrate dehydrogenase NADP-dependent                    | Isocitrate dehydrogenase (NADP <sup>+</sup> ) activity                | N/A                                    | No           | No             |
| Medium                                                                                                                                  | Fit2        | FBgn0036688 | PLEKHC1       | FERM, Pleckstrin homology-type, Band 4.1                   | Cell adhesion molecule binding                                        | N/A                                    | Yes          | No             |
| <b>Class II. Muscles are spread, myosin filaments still show a striated pattern, but actin filaments show no discernible striations</b> |             |             |               |                                                            |                                                                       |                                        |              |                |
| Severe                                                                                                                                  | CG6640      | FBgn0036068 |               | Sugar transporter superfamily                              | Transporter activity                                                  | N/A                                    | No           | No             |
| Severe                                                                                                                                  | eIF-4E      | FBgn0015218 | EIF4E         | Eukaryotic translation initiation factor 4E (eIF-4E)       | Translation                                                           | N/A                                    | No           | N/A            |
| Severe                                                                                                                                  | Pros26      | FBgn0002284 | PSMB1         | 20S proteasome, A and B subunits                           | Endopeptidase activity                                                | Yes                                    | Yes          | N/A            |
| Severe                                                                                                                                  | CG8789      | FBgn0036896 | MAP3K12       | Protein kinase                                             | Protein kinase activity                                               | N/A                                    | No           | N/A            |
| Severe                                                                                                                                  | Prosbeta2   | FBgn0023174 | PSMB7         | 20S proteasome, A and B subunits,                          | Mitosis and meiosis                                                   | N/A                                    | Yes          | Yes            |
| Severe                                                                                                                                  | abs         | FBgn0015331 | DDX41         | DEAD/DEAH box helicase                                     | ATP-dependent RNA helicase activity                                   | N/A                                    | Yes          | No             |
| Severe                                                                                                                                  | CG9779      | FBgn0037231 | VPS24         | Snf7                                                       | Vacuolar protein sorting 24                                           | N/A                                    | No           | N/A            |
| Severe                                                                                                                                  | CG9776      | FBgn0027866 |               | Zn-finger, C2H2 type                                       | Nucleic acid binding, zinc ion binding                                | N/A                                    | N/A          | N/A            |
| Severe                                                                                                                                  | Taf4        | FBgn0010280 | TAF4B         | Transcription initiation factor TFIID component TAF        | Transcription initiation factor activity                              | Yes                                    | No           | No             |
| Severe                                                                                                                                  | CG14648     | FBgn0037245 |               | 5-formyltetrahydrofolate cyclo-ligase                      | Catalytic activity                                                    | N/A                                    | N/A          | No             |
| Severe                                                                                                                                  | CG5027      | FBgn0036579 |               | Thioredoxin domain 2, Thioredoxin-related, Calsequestrin   | Electron transporter activity                                         | No                                     | N/A          | N/A            |
| Severe                                                                                                                                  | CG31523     | FBgn0051523 |               | Multicopper oxidase, copper-binding site                   | Acyltransferase activity; copper ion binding                          | Yes                                    | Yes          | No             |
| Severe                                                                                                                                  | pygo        | FBgn0043900 | PYGO2         | Zn-finger-like, PHD finger, Aminoacyl-tRNA synthetase      | DNA binding; ATP binding; tRNA ligase activity; protein binding       | N/A                                    | Yes          | No             |
| Severe                                                                                                                                  | deltaCOP    | FBgn0028969 | ARCN1         | Longin-like, Mu2 adaptin subunit (AP50) of AP2             |                                                                       | N/A                                    | No           | No             |
| Severe                                                                                                                                  | CG1890      | FBgn0039869 | TBCA          | Tubulin binding cofactor A                                 | Unfolded protein binding                                              | N/A                                    | Yes          | No             |
| Severe                                                                                                                                  | CG3457      | FBgn0024984 |               | N/A                                                        | N/A                                                                   | N/A                                    | N/A          | N/A            |
| Severe                                                                                                                                  | PH4alphaNE1 | FBgn0039780 |               | Tetratricopeptide-like helical, Hpt, Prolyl 4-hydroxylase, | Procollagen-proline 4-dioxygenase activity                            | N/A                                    | N/A          | N/A            |
| Severe                                                                                                                                  | lva         | FBgn0029688 |               | Microfilament/microtubule-associated proteins (MMAPs)      | Actin binding; microtubule binding; protein binding; spectrin binding | N/A                                    | N/A          | N/A            |

|        |            |             |        |                                                                                                                        |                                                    |     |     |     |
|--------|------------|-------------|--------|------------------------------------------------------------------------------------------------------------------------|----------------------------------------------------|-----|-----|-----|
| Medium | CG6020     | FBgn0037001 | NDUFA9 | N/A                                                                                                                    | NADH dehydrogenase (ubiquinone) activity           | Yes | N/A | N/A |
| Medium | CG6014     | FBgn0027542 |        | N/A                                                                                                                    | N/A                                                | N/A | N/A | N/A |
| Medium | atms       | FBgn0010750 | PD2    | RNA polymerase II associated, Paf1                                                                                     | Kinesin activity                                   | N/A | N/A | N/A |
| Medium | CG1544     | FBgn0039827 | DHTKD1 | Transketolase, central region, 2-oxoglutarate dehydrogenase E1 component                                               |                                                    | N/A | Yes | No  |
| Medium | Nf1        | FBgn0015269 | NF1    | Rho GTPase activation protein, Ras GTPase-activating protein, Cellular retinaldehyde-binding/triple function, C-, HEAT | Ras GTPase activator activity; receptor binding    | N/A | Yes | N/A |
| Medium | Mgat2      | FBgn0039738 | MGAT2  | N-acetylglucosaminyltransferase II                                                                                     |                                                    | No  | Yes | No  |
| Severe | RhoGAP100F | FBgn0039883 |        | PDZ/DHR/GLGF, RhoGAP, C2                                                                                               | GTPase activator activity; receptor binding        | N/A | Yes | No  |
| Severe | Actn       | FBgn0000667 | ACTN1  | EF-Hand type, Actin-binding, actinin-type                                                                              | Actin filament binding                             | N/A | Yes | No  |
| Severe | Rpn1       | FBgn0028695 | PSMD2  | Proteasome/cyclosome, regulatory subunit                                                                               | Endopeptidase activity, enzyme regulatory activity | N/A | No  | N/A |
| Severe | Rpn2       | FBgn0028692 | PSMD1  | Proteasome/cyclosome, regulatory subunit                                                                               | Endopeptidase activity, enzyme regulatory activity | N/A | Yes | No  |

---

**Class III. Muscles are spread, and both actin and myosin filaments lack striation**


---

|        |      |             |       |                                                      |                                                             |     |     |     |
|--------|------|-------------|-------|------------------------------------------------------|-------------------------------------------------------------|-----|-----|-----|
| Severe | Prm  | FBgn0003149 |       | Myosin tail                                          | Striated muscle thick filament                              | N/A | Yes | No  |
| Severe | bt   | FBgn0005666 |       | Protein kinase-like, Fibronectin, type III-like fold | Myosin-light-Chain kinase activity                          | N/A | Yes | No  |
| Severe | Mlc2 | FBgn0002773 | MYL2  | EF-Hand type, Calcium-binding EF-hand                | Microfilament motor activity                                | N/A | Yes | No  |
| Severe | Tmod | FBgn0082582 | TMOD1 | Tropomodulin                                         | Tropomyosin binding; actin binding;                         | N/A | Yes | No  |
| Medium | polo | FBgn0003124 | PLK1  | POLO box duplicated region, Protein kinase           | Receptor signaling protein serine/threonine kinase activity | N/A | Yes | Yes |

---

**Class IV. Muscles with short and/or thin myofibrils**


---

|        |         |             |         |                                                                    |                                                                |     |     |    |
|--------|---------|-------------|---------|--------------------------------------------------------------------|----------------------------------------------------------------|-----|-----|----|
| Severe | Ac76E   | FBgn0004852 |         | Guanylate cyclase                                                  | Guanylate cyclase activity, G protein coupled receptor pathway | N/A | Yes | No |
| Severe | CG5931  | FBgn0036548 | ASCC3L1 | DEAD/DEAH box helicase, Sec63                                      | ATP-dependent RNA helicase activity                            | N/A | Yes | No |
| Severe | CG31374 | FBgn0051374 |         | Actin binding WH2 domains                                          | Actin binding, actin assembly                                  | N/A | No  | No |
| Severe | CG8636  | FBgn0029629 | EIF354  | Zn-finger, CCHC type, RNA-binding region RNP-1                     | Translation initiation factor activity;                        | Yes | No  | No |
| Severe | CG8743  | FBgn0036904 | MCOLN3  | Cation (not K+) channel, Ca <sup>2+</sup> /Na <sup>+</sup> channel | Calcium channel activity                                       | N/A | No  | No |
| Severe | crn     | FBgn0000377 | CRNKL1  | Phosphatidylinositol transfer protein-like, N-termi                | Pre-mRNA splicing factor activity; transporter activity        | N/A | No  | No |
| Severe | Taf2    | FBgn0011836 | TAF2    | N-6 Adenine-specific DNA methylase                                 | General RNA polymerase transcription factor activity           | Yes | No  | No |
| Severe | Trn     | FBgn0024921 | TNPO1   | Armadillo-like helical, Importin-beta, N-terminal,                 | Protein carrier activity                                       | N/A | N/A | No |

|        |       |             |       |                                         |                                                          |     |     |    |
|--------|-------|-------------|-------|-----------------------------------------|----------------------------------------------------------|-----|-----|----|
| Severe | Vinc  | FBgn0004397 | VCL   | Vinculin/alpha-catenin, Vinculin        | Actin binding; structural constituent of cytoskeleton    | N/A | N/A | No |
| Severe | RpL4  | FBgn0003279 | RPL4  | Ribosomal protein L4/L1e                | Nucleic acid binding; structural constituent of ribosome | N/A | No  | No |
| Severe | RpS12 | FBgn0014027 | RPS12 | Ribosomal protein L7Ae/L30e/S12e/Gadd45 | Nucleic acid binding; structural constituent of ribosome | Yes | No  | No |
| Severe | RpS9  | FBgn0010408 | RPS9  | RNA-binding S4, Ribosomal protein S4/9, | Nucleic acid binding; structural constituent of ribosome | N/A | Yes | No |

---

RNAi phenotypes could be observed with an independent second set of amplicons. The hits are grouped into four distinct phenotypic classes (see Results) and are listed by the severity of their RNAi muscle phenotypes in primary culture. Human orthologs were determined by reciprocal BLASTP. The putative expression of *Drosophila* genes in the mesoderm (either myoblasts and/or muscles) were based on the Berkeley *Drosophila* Genome Project (BDGP) in situ expression database (<http://www.fruitfly.org/cgi-bin/ex/in situ.pl>), Dmef2 loss-of-function microarray database [the fold enrichment log<sub>2</sub> (mutant/wild type) is at least 0.5 or lower] (Sandmann et al., 2006) and Dmef2 chip-on-chip database (Sandmann et al., 2006) (<http://furlonglab.embl.de/data>), and myoblast gene expression database [the fold enrichment log<sub>2</sub> (mutant/wild type) is at least 0.7 or lower] (Estrada et al., 2006).

---
