# Supplementary material for: RNA interference screening in Drosophila primary cells for genes involved in muscle assembly and maintenance
Source: Oxford University Press journal article supplement (doi:10.1242/dev.012849), 2008-03-21
Supplement: dev012849-sup-012849-tables3.pdf [file dev012849-sup-012849-tables3.pdf]

**Table S3. List of amplicons for generating dsRNAs targeting the genes that are listed in Table S2**

| Gene name   | FBgn#       | Amplicons                                  |
|-------------|-------------|--------------------------------------------|
| CG2165      | FBgn0025704 | DRSC17113, DRSC17114, DRSC17154, DRSC34373 |
| Fit1        | FBgn0035498 | DRSC08450, DRSC34432                       |
| Idh         | FBgn0001248 | DRSC10779, DRSC34441                       |
| Fit2        | FBgn0036688 | DRSC10908, DRSC32125                       |
| CG6640      | FBgn0036068 | DRSC10681, DRSC34404                       |
| eIF-4E      | FBgn0015218 | DRSC11342, DRSC32113                       |
| Pros26      | FBgn0002284 | DRSC11256, DRSC32168                       |
| CG8789      | FBgn0036896 | DRSC11046, DRSC34410                       |
| Prosbeta2   | FBgn0023174 | DRSC11257, DRSC32178                       |
| abs         | FBgn0015331 | DRSC12372, DRSC31883                       |
| CG9779      | FBgn0037231 | DRSC12332, DRSC34417                       |
| CG9776      | FBgn0027866 | DRSC12127, DRSC34415                       |
| Taf4        | FBgn0010280 | DRSC11297, DRSC31762                       |
| CG14648     | FBgn0037245 | DRSC12002, DRSC34034                       |
| CG5027      | FBgn0036579 | DRSC10471, DRSC34391                       |
| CG31523     | FBgn0051523 | DRSC12009, DRSC34377, DRSC34378            |
| pygo        | FBgn0043900 | DRSC14322, DRSC33088                       |
| deltaCOP    | FBgn0028969 | DRSC18760, DRSC31062, DRSC31063            |
| CG1890      | FBgn0039869 | DRSC15395, DRSC29064                       |
| CG3457      | FBgn0024984 | DRSC18509, DRSC34386                       |
| PH4alphaNE1 | FBgn0039780 | DRSC16546, DRSC34461, DRSC34462            |
| lva         | FBgn0029688 | DRSC18403, DRSC31278, DRSC31279            |
| CG6020      | FBgn0037001 | DRSC11791, DRSC34398, DRSC34399            |
| CG6014      | FBgn0027542 | DRSC11609, DRSC34396, DRSC34397            |
| atms        | FBgn0010750 | DRSC12310, DRSC34353, DRSC34354            |
| CG1544      | FBgn0039827 | DRSC15036, DRSC34369, DRSC34370            |
| Nf1         | FBgn0015269 | DRSC16758, DRSC34456, DRSC34457            |
| Mgat2       | FBgn0039738 | DRSC16347, DRSC34446, DRSC34447            |
| RhoGAP100F  | FBgn0039883 | DRSC15409, DRSC34466, DRSC34467            |
| Actn        | FBgn0000667 | DRSC17724, DRSC34351, DRSC34352            |
| Rpn1        | FBgn0028695 | DRSC11274, DRSC32192, DRSC32193            |
| Rpn2        | FBgn0028692 | DRSC16839, DRSC32198, DRSC32199            |
| Prm         | FBgn0003149 | DRSC11255, DRSC36327, DRSC36328            |
| bt          | FBgn0005666 | DRSC17129, DRSC17171, DRSC34355, DRSC34356 |
| Mlc2        | FBgn0002773 | DRSC16741, DRSC32500, DRSC32501            |
| Tmod        | FBgn0082582 | DRSC17062, DRSC34480, DRSC34481            |
| polo        | FBgn0003124 | DRSC11384, DRSC34463, DRSC34464            |
| Ac76E       | FBgn0004852 | DRSC09642, DRSC32652, DRSC32653            |
| CG5931      | FBgn0036548 | DRSC10559, DRSC32419, DRSC32420            |
| CG31374     | FBgn0051374 | DRSC14925, DRSC16113, DRSC32900, DRSC32901 |
| CG8636      | FBgn0029629 | DRSC18427, DRSC32088                       |
| CG8743      | FBgn0036904 | DRSC11032, DRSC31589, DRSC31590            |
| crn         | FBgn0000377 | DRSC18184, DRSC31852, DRSC31853            |
| Taf2        | FBgn0011836 | DRSC11298, DRSC33206, DRSC33207            |
| Trn         | FBgn0024921 | DRSC11309, DRSC32777, DRSC32778            |
| Vinc        | FBgn0004397 | DRSC18728, DRSC31286, DRSC31287            |
| RpL4        | FBgn0003279 | DRSC16833, DRSC32560, DRSC32561            |
| RpS12       | FBgn0014027 | DRSC11270, DRSC34294                       |
| RpS9        | FBgn0010408 | DRSC11273, DRSC32598, DRSC32599            |
| Lasp        | FBgn0063485 | DRSC10379, DRSC34926, DRSC34927            |
| Act57B      | FBgn0000044 | DRSC04042, DRSC31414                       |
| Act42A      | FBgn0000043 | DRSC04835, DRSC25061                       |
| Act87E      | FBgn0000046 | DRSC22578, DRSC23961                       |
| Act5C       | FBgn0000042 | DRSC17723, DRSC31415, DRSC31416            |
| Tm1         | FBgn0003721 | DRSC13082, DRSC13083, DRSC16886, DRSC25249 |
| up          | FBgn0004169 | DRSC20382, DRSC28798                       |
| mtm         | FBgn0025742 | DRSC03576, DRSC36585, DRSC36764, DRSC36765 |

|          |             |                                                                                        |
|----------|-------------|----------------------------------------------------------------------------------------|
| Rya-r44F | FBgn0011286 | DRSC07543                                                                              |
| mew      | FBgn0004456 | DRSC18971, DRSC20352, DRSC35847                                                        |
| Mhc      | FBgn0002741 | DRSC03367, DRSC25959, DRSC34448, DRSC34449                                             |
| up       | FBgn0004169 | DRSC20382, DRSC28798                                                                   |
| sls      | FBgn0003432 | DRSC08528, DRSC08540, DRSC08670, DRSC32611, DRSC32612, DRSC36617, DRSC36618            |
| sqh      | FBgn0003514 | DRSC18837, DRSC23800, DRSC34474, DRSC34475                                             |
| mlc-c    | FBgn0004687 | DRSC18683, DRSC26543                                                                   |
| wupA     | FBgn0004028 | DRSC20385, DRSC22547, DRSC29330, DRSC31986                                             |
| bt       | FBgn0005666 | DRSC17129, DRSC17171, DRSC34355, DRSC34356, DRSC36656, DRSC36657                       |
| Vinc     | FBgn0004397 | DRSC18728, DRSC31286, DRSC31287                                                        |
| Rya-r44F | FBgn0011286 | DRSC07543                                                                              |
| tafazzin | FBgn0026619 | DRSC07704, DRSC27100, DRSC36045                                                        |
| Dys      | FBgn0024242 | DRSC13360, DRSC13364, DRSC15260, DRSC16218, DRSC16219, DRSC16220, DRSC16232, DRSC16935 |
| Lam      | FBgn0002525 | DRSC03359, DRSC33323, DRSC33324                                                        |
| mfr      | FBgn0035935 | DRSC10543                                                                              |
| Scgdelta | FBgn0025391 | DRSC18544                                                                              |
| CalpB    | FBgn0025866 | DRSC11109, DRSC25885                                                                   |
| Scgalpha | FBgn0032013 | DRSC03076, DRSC29625                                                                   |
| Scgdelta | FBgn0025391 | DRSC18544                                                                              |
| CG15105  | FBgn0034412 | DRSC05768, DRSC06532, DRSC27711                                                        |
| wb       | FBgn0004002 | DRSC03634, DRSC36402                                                                   |

---
